# Supplementary material
Source: PubMed Central journal article supplement (PMC7816278)
Supplement: NIHMS1584150-supplement-8.pdf [file NIHMS1584150-supplement-8.pdf]

**Table S1. Properties associated with stress granule and P-body proteins examined in this study, Related to Figures 1-6.**

| <b>Stress granule and P-body proteins examined in study</b> |                |                   |                    |                          |               |               |                   |
|-------------------------------------------------------------|----------------|-------------------|--------------------|--------------------------|---------------|---------------|-------------------|
| <b>Gene</b>                                                 | <b>SGs/PBs</b> | <b>Essential?</b> | <b>Rescues SG?</b> | <b>SGs (Corelet)</b>     | <b>[nM]//</b> | <b>RBDs?</b>  | <b>RGG?</b>       |
| CAPRIN1                                                     | SG             | No                | No                 | <b>Yes</b>               | 351.78        | RGG           | <b>Yes</b>        |
| CIRBP                                                       | SG             | Not tested        | No                 | <b>Yes</b>               | 318.97        | RGG           | <b>Yes</b>        |
| DCP1A                                                       | PB             | Not tested        | No                 | No                       | 73.83         | None          | No                |
| DDX3X                                                       | SG             | Not tested        | No                 | <b>Yes</b>               | 1129.34       | Helicase      | <b>Yes, small</b> |
| DDX6                                                        | Both           | Not tested        | No                 | Not tested               | 551.71        | Helicase      | No                |
| EDC3                                                        | PB             | Not tested        | No                 | No                       | 93.35         | None          | No                |
| EIF3F                                                       | SG             | Not tested        | No                 | <b>Yes</b>               | 1029.1        | EIF3 Complex  | No                |
| FUS                                                         | SG             | Not tested        | No                 | <b>Yes</b>               | 1400.44       | RRM, RGG, Zn  | <b>Yes</b>        |
| FMR1/FXR1/2                                                 | SG             | No                | <b>Yes</b>         | <b>Yes</b>               | 751.51        | KH (2), RGG   | <b>Yes</b>        |
| G3BP1/2                                                     | SG             | <b>Yes</b>        | <b>Yes</b>         | <b>Yes</b>               | 1446.31       | RRM, RGG      | <b>Yes</b>        |
| HNRNPA1                                                     | SG             | Not tested        | No                 | <b>Yes</b>               | 7636.87       | RRM (2), RGG  | <b>Yes</b>        |
| LSM14A/B                                                    | Both           | Not tested        | Not tested         | <b>Yes</b>               | 329.72        | RGG (2)       | <b>Yes</b>        |
| NUFIP2                                                      | SG             | No                | No                 | Not tested               | 178.98        | Non-canonical | No                |
| PABPC1/4                                                    | SG             | Not tested        | No                 | <b>Yes</b>               | 3149.78       | RRM (4)       | No                |
| TDP43                                                       | SG             | Not tested        | No                 | Not tested               | 593.96        | RRM (2)       | No                |
| TIA1/L1                                                     | SG             | Not tested        | No                 | <b>Yes</b>               | 203.36        | RRM (3)       | No                |
| UBAP2/2L                                                    | SG*            | <b>Yes/no</b>     | <b>Yes</b>         | <b>Yes</b>               | 762.08        | RGG           | <b>Yes</b>        |
| UPF1                                                        | SG             | Not tested        | No                 | Not tested               | 294.36        | Zn, helicase  | No                |
| USP10                                                       | SG             | No                | No                 | No                       | 95.07         | None          | No                |
| YBX1                                                        | SG             | Not tested        | No                 | <b>Yes</b>               | 1436.67       | CSD           | No                |
| <b>*In P-bodies when G3BP is knocked out</b>                |                |                   |                    | <b>//See Hein et al.</b> |               |               |                   |

**Table S2. Generation of U2OS knockout cell lines and validation by Western blot, Related to Figures 1-6.**

| <b>Protein</b>    | <b>gRNA sequence</b>                                                                                                                                                                                                 | <b>Antibody validation</b>                 |
|-------------------|----------------------------------------------------------------------------------------------------------------------------------------------------------------------------------------------------------------------|--------------------------------------------|
| NUFIP2            | 5'- ATC ATC AAG TCG CTT ATC CC -3'                                                                                                                                                                                   | Bethyl A301-600A;<br>PTG NUFIP2 17752-1-AP |
| FMR1              | 5'-AAG AGG CGG CAC ATA AGG AT-3'                                                                                                                                                                                     | PTG 13194-1-AP<br>Santa Cruz sc-101048     |
| FXR1              | 5'-TTC CTA GGA ATC TCG TTG GT-3'                                                                                                                                                                                     | Bethyl A303-892A;<br>PTG 13194-1-AP        |
| FXR2              | 5'-CCC CAT AGG TTC GAG TCG CA-3'                                                                                                                                                                                     | Santa Cruz sc-32266                        |
| CAPRIN1           | 5'-CTC CCG GAG GAA CCC GAC GG-3'                                                                                                                                                                                     | PTG 15112-1-AP                             |
| USP10             | 5'-GACTCCTCGATCTTCAGTTG-3'                                                                                                                                                                                           | Bethyl A300-900A1;<br>Bethyl A300-901A     |
| UBAP2L            | 5'-CAC CAC GAG CGC CTC TTC AA-3'                                                                                                                                                                                     | Bethyl A300-534A;<br>Bethyl A300-533A      |
| UBAP2<br>(pooled) | 5'-TTT CCC GAG CAC CTC GAC AA-3'<br>5'-TGA GAC GGA GGT CGC TGC CG-3'<br>5'-GTT CGC GGT GTT CAT GCT AC-3'<br>5'-GTG AGC AGT GAC CAT TGT CG-3'<br>5'-GTC TCA AGT TCC GCA TCC TC-3'<br>5'-GCC GCG CCC TTG GTG ACC TC-3' | Bethyl A304-626A;<br>Bethyl A304-627A      |
